# Supplementary material
Source: HighWire-hosted journal article supplement (https://srh.bmj.com/content/48/1/7)
Supplement: inline-supplementary-material-2 [file inline-supplementary-material-2.pdf]

**Table S2.** Search strategy

---

**Search terms**

---

(((blood borne virus) Or sexual)) AND (((Staff) OR health care professional) AND  
((((((((retard) OR infirm) OR cripple) OR special needs) OR handicap) OR impairment)  
OR impaired) OR disabilities) OR disabled) OR disability)))

---
