# Supplementary material
Source: HighWire-hosted journal article supplement (https://srh.bmj.com/content/48/1/7)
Supplement: inline-supplementary-material-3 [file inline-supplementary-material-3.pdf]

**Table S3.** Inclusion and exclusion criteria

---

**Inclusion Criteria**

Peer-reviewed papers reporting primary data on the experiences of healthcare professionals surrounding sexual and reproductive healthcare for people with disabilities, or results of staff training programmes/workshops surrounding the subject.

---

**Exclusion Criteria**

Studies not published or translated into English  
Articles without full text available  
Paper which only discussed staff attitudes on the subject due to previous systematic reviews, except in the context of training programmes

---
