# Supplementary material
Source: HighWire-hosted journal article supplement (https://srh.bmj.com/content/48/1/7)
Supplement: inline-supplementary-material-4 [file inline-supplementary-material-4.pdf]

**Tables S4:** Tables of methodological assessment

| Category of study designs                    | Methodological quality criteria                                                                                                  | Responses |    |            |                                                           |
|----------------------------------------------|----------------------------------------------------------------------------------------------------------------------------------|-----------|----|------------|-----------------------------------------------------------|
|                                              |                                                                                                                                  | Yes       | No | Can't tell | Comments                                                  |
| Screening questions (for all types)          | S1. Are there clear research questions?                                                                                          | ✓         |    |            |                                                           |
|                                              | S2. Do the collected data allow to address the research questions?                                                               | ✓         |    |            |                                                           |
|                                              | Further appraisal may not be feasible or appropriate when the answer is 'No' or 'Can't tell' to one or both screening questions. |           |    |            |                                                           |
| 1. Qualitative                               | 1.1. Is the qualitative approach appropriate to answer the research question?                                                    |           |    |            |                                                           |
|                                              | 1.2. Are the qualitative data collection methods adequate to address the research question?                                      |           |    |            |                                                           |
|                                              | 1.3. Are the findings adequately derived from the data?                                                                          |           |    |            |                                                           |
|                                              | 1.4. Is the interpretation of results sufficiently substantiated by data?                                                        |           |    |            |                                                           |
|                                              | 1.5. Is there coherence between qualitative data sources, collection, analysis and interpretation?                               |           |    |            |                                                           |
| 2. Quantitative randomized controlled trials | 2.1. Is randomization appropriately performed?                                                                                   |           |    |            |                                                           |
|                                              | 2.2. Are the groups comparable at baseline?                                                                                      |           |    |            |                                                           |
|                                              | 2.3. Are there complete outcome data?                                                                                            |           |    |            |                                                           |
|                                              | 2.4. Are outcome assessors blinded to the intervention provided?                                                                 |           |    |            |                                                           |
|                                              | 2.5. Did the participants adhere to the assigned intervention?                                                                   |           |    |            |                                                           |
| 3. Quantitative non-randomized               | 3.1. Are the participants representative of the target population?                                                               |           |    |            |                                                           |
|                                              | 3.2. Are measurements appropriate regarding both the outcome and intervention (or exposure)?                                     |           |    |            |                                                           |
|                                              | 3.3. Are there complete outcome data?                                                                                            |           |    |            |                                                           |
|                                              | 3.4. Are the confounders accounted for in the design and analysis?                                                               |           |    |            |                                                           |
|                                              | 3.5. During the study period, is the intervention administered (or exposure occurred) as intended?                               |           |    |            |                                                           |
| 4. Quantitative descriptive                  | 4.1. Is the sampling strategy relevant to address the research question?                                                         | ✓         |    |            |                                                           |
|                                              | 4.2. Is the sample representative of the target population?                                                                      |           | ✓  |            |                                                           |
|                                              | 4.3. Are the measurements appropriate?                                                                                           |           | ✓  |            | Didn't assess knowledge/ skills or follow-up measurements |
|                                              | 4.4. Is the risk of nonresponse bias low?                                                                                        |           | ✓  |            | Voluntary participation                                   |
|                                              | 4.5. Is the statistical analysis appropriate to answer the research question?                                                    |           | ✓  |            |                                                           |
| 5. Mixed methods                             | 5.1. Is there an adequate rationale for using a mixed methods design to address the research question?                           |           |    |            |                                                           |
|                                              | 5.2. Are the different components of the study effectively integrated to answer the research question?                           |           |    |            |                                                           |
|                                              | 5.3. Are the outputs of the integration of qualitative and quantitative components adequately interpreted?                       |           |    |            |                                                           |
|                                              | 5.4. Are divergences and inconsistencies between quantitative and qualitative results adequately addressed?                      |           |    |            |                                                           |
|                                              | 5.5. Do the different components of the study adhere to the quality criteria of each tradition of the methods involved?          |           |    |            |                                                           |

Baker &amp; Shears, 2010

| Category of study designs                    | Methodological quality criteria                                                                                                         | Responses |    |            |          |
|----------------------------------------------|-----------------------------------------------------------------------------------------------------------------------------------------|-----------|----|------------|----------|
|                                              |                                                                                                                                         | Yes       | No | Can't tell | Comments |
| Screening questions (for all types)          | S1. Are there clear research questions?                                                                                                 | ✓         |    |            |          |
|                                              | S2. Do the collected data allow to address the research questions?                                                                      | ✓         |    |            |          |
|                                              | <i>Further appraisal may not be feasible or appropriate when the answer is 'No' or 'Can't tell' to one or both screening questions.</i> |           |    |            |          |
| 1. Qualitative                               | 1.1. Is the qualitative approach appropriate to answer the research question?                                                           | ✓         |    |            |          |
|                                              | 1.2. Are the qualitative data collection methods adequate to address the research question?                                             | ✓         |    |            |          |
|                                              | 1.3. Are the findings adequately derived from the data?                                                                                 | ✓         |    |            |          |
|                                              | 1.4. Is the interpretation of results sufficiently substantiated by data?                                                               | ✓         |    |            |          |
|                                              | 1.5. Is there coherence between qualitative data sources, collection, analysis and interpretation?                                      | ✓         |    |            |          |
| 2. Quantitative randomized controlled trials | 2.1. Is randomization appropriately performed?                                                                                          |           |    |            |          |
|                                              | 2.2. Are the groups comparable at baseline?                                                                                             |           |    |            |          |
|                                              | 2.3. Are there complete outcome data?                                                                                                   |           |    |            |          |
|                                              | 2.4. Are outcome assessors blinded to the intervention provided?                                                                        |           |    |            |          |
|                                              | 2.5 Did the participants adhere to the assigned intervention?                                                                           |           |    |            |          |
| 3. Quantitative non- randomized              | 3.1. Are the participants representative of the target population?                                                                      |           |    |            |          |
|                                              | 3.2. Are measurements appropriate regarding both the outcome and intervention (or exposure)?                                            |           |    |            |          |
|                                              | 3.3. Are there complete outcome data?                                                                                                   |           |    |            |          |
|                                              | 3.4. Are the confounders accounted for in the design and analysis?                                                                      |           |    |            |          |
|                                              | 3.5. During the study period, is the intervention administered (or exposure occurred) as intended?                                      |           |    |            |          |
| 4. Quantitative descriptive                  | 4.1. Is the sampling strategy relevant to address the research question?                                                                |           |    |            |          |
|                                              | 4.2. Is the sample representative of the target population?                                                                             |           |    |            |          |
|                                              | 4.3. Are the measurements appropriate?                                                                                                  |           |    |            |          |
|                                              | 4.4. Is the risk of nonresponse bias low?                                                                                               |           |    |            |          |
|                                              | 4.5. Is the statistical analysis appropriate to answer the research question?                                                           |           |    |            |          |
| 5. Mixed methods                             | 5.1. Is there an adequate rationale for using a mixed methods design to address the research question?                                  |           |    |            |          |
|                                              | 5.2. Are the different components of the study effectively integrated to answer the research question?                                  |           |    |            |          |
|                                              | 5.3. Are the outputs of the integration of qualitative and quantitative components adequately interpreted?                              |           |    |            |          |
|                                              | 5.4. Are divergences and inconsistencies between quantitative and qualitative results adequately addressed?                             |           |    |            |          |
|                                              | 5.5. Do the different components of the study adhere to the quality criteria of each tradition of the methods involved?                 |           |    |            |          |

Castell &amp; Stenfert Kroese, 2016

| Category of study designs                    | Methodological quality criteria                                                                                                         | Responses |    |            |                                              |
|----------------------------------------------|-----------------------------------------------------------------------------------------------------------------------------------------|-----------|----|------------|----------------------------------------------|
|                                              |                                                                                                                                         | Yes       | No | Can't tell | Comments                                     |
| Screening questions (for all types)          | S1. Are there clear research questions?                                                                                                 | ✓         |    |            |                                              |
|                                              | S2. Do the collected data allow to address the research questions?                                                                      | ✓         |    |            |                                              |
|                                              | <i>Further appraisal may not be feasible or appropriate when the answer is 'No' or 'Can't tell' to one or both screening questions.</i> |           |    |            |                                              |
| 1. Qualitative                               | 1.1. Is the qualitative approach appropriate to answer the research question?                                                           | ✓         |    |            |                                              |
|                                              | 1.2. Are the qualitative data collection methods adequate to address the research question?                                             | ✓         |    |            |                                              |
|                                              | 1.3. Are the findings adequately derived from the data?                                                                                 | ✓         |    |            |                                              |
|                                              | 1.4. Is the interpretation of results sufficiently substantiated by data?                                                               | ✓         |    |            |                                              |
|                                              | 1.5. Is there coherence between qualitative data sources, collection, analysis and interpretation?                                      | ✓         |    |            |                                              |
| 2. Quantitative randomized controlled trials | 2.1. Is randomization appropriately performed?                                                                                          |           |    |            |                                              |
|                                              | 2.2. Are the groups comparable at baseline?                                                                                             |           |    |            |                                              |
|                                              | 2.3. Are there complete outcome data?                                                                                                   |           |    |            |                                              |
|                                              | 2.4. Are outcome assessors blinded to the intervention provided?                                                                        |           |    |            |                                              |
|                                              | 2.5. Did the participants adhere to the assigned intervention?                                                                          |           |    |            |                                              |
| 3. Quantitative non-randomized               | 3.1. Are the participants representative of the target population?                                                                      | ✓         |    |            |                                              |
|                                              | 3.2. Are measurements appropriate regarding both the outcome and intervention (or exposure)?                                            | ✓         |    |            |                                              |
|                                              | 3.3. Are there complete outcome data?                                                                                                   |           | ✓  |            | Approx. half of data missing so not included |
|                                              | 3.4. Are the confounders accounted for in the design and analysis?                                                                      | ✓         |    |            |                                              |
|                                              | 3.5. During the study period, is the intervention administered (or exposure occurred) as intended?                                      | ✓         |    |            |                                              |
| 4. Quantitative descriptive                  | 4.1. Is the sampling strategy relevant to address the research question?                                                                |           |    |            |                                              |
|                                              | 4.2. Is the sample representative of the target population?                                                                             |           |    |            |                                              |
|                                              | 4.3. Are the measurements appropriate?                                                                                                  |           |    |            |                                              |
|                                              | 4.4. Is the risk of nonresponse bias low?                                                                                               |           |    |            |                                              |
|                                              | 4.5. Is the statistical analysis appropriate to answer the research question?                                                           |           |    |            |                                              |
| 5. Mixed methods                             | 5.1. Is there an adequate rationale for using a mixed methods design to address the research question?                                  | ✓         |    |            |                                              |
|                                              | 5.2. Are the different components of the study effectively integrated to answer the research question?                                  | ✓         |    |            |                                              |
|                                              | 5.3. Are the outputs of the integration of qualitative and quantitative components adequately interpreted?                              | ✓         |    |            |                                              |
|                                              | 5.4. Are divergences and inconsistencies between quantitative and qualitative results adequately addressed?                             | ✓         |    |            |                                              |
|                                              | 5.5. Do the different components of the study adhere to the quality criteria of each tradition of the methods involved?                 | ✓         |    |            |                                              |

Dyer *et al.* 2014

| Category of study designs                    | Methodological quality criteria                                                                                                         | Responses |    |            |                                           |
|----------------------------------------------|-----------------------------------------------------------------------------------------------------------------------------------------|-----------|----|------------|-------------------------------------------|
|                                              |                                                                                                                                         | Yes       | No | Can't tell | Comments                                  |
| Screening questions (for all types)          | S1. Are there clear research questions?                                                                                                 | ✓         |    |            |                                           |
|                                              | S2. Do the collected data allow to address the research questions?                                                                      | ✓         |    |            |                                           |
|                                              | <i>Further appraisal may not be feasible or appropriate when the answer is 'No' or 'Can't tell' to one or both screening questions.</i> |           |    |            |                                           |
| 1. Qualitative                               | 1.1. Is the qualitative approach appropriate to answer the research question?                                                           | ✓         |    |            |                                           |
|                                              | 1.2. Are the qualitative data collection methods adequate to address the research question?                                             | ✓         |    |            |                                           |
|                                              | 1.3. Are the findings adequately derived from the data?                                                                                 | ✓         |    |            |                                           |
|                                              | 1.4. Is the interpretation of results sufficiently substantiated by data?                                                               | ✓         |    |            |                                           |
|                                              | 1.5. Is there coherence between qualitative data sources, collection, analysis and interpretation?                                      | ✓         |    |            |                                           |
| 2. Quantitative randomized controlled trials | 2.1. Is randomization appropriately performed?                                                                                          | ✓         |    |            |                                           |
|                                              | 2.2. Are the groups comparable at baseline?                                                                                             | ✓         |    |            |                                           |
|                                              | 2.3. Are there complete outcome data?                                                                                                   | ✓         |    |            |                                           |
|                                              | 2.4. Are outcome assessors blinded to the intervention provided?                                                                        |           |    | ✓          |                                           |
|                                              | 2.5 Did the participants adhere to the assigned intervention?                                                                           |           |    | ✓          | Intergroup discussion cannot be ruled out |
| 3. Quantitative non- randomized              | 3.1. Are the participants representative of the target population?                                                                      |           |    |            |                                           |
|                                              | 3.2. Are measurements appropriate regarding both the outcome and intervention (or exposure)?                                            |           |    |            |                                           |
|                                              | 3.3. Are there complete outcome data?                                                                                                   |           |    |            |                                           |
|                                              | 3.4. Are the confounders accounted for in the design and analysis?                                                                      |           |    |            |                                           |
|                                              | 3.5. During the study period, is the intervention administered (or exposure occurred) as intended?                                      |           |    |            |                                           |
| 4. Quantitative descriptive                  | 4.1. Is the sampling strategy relevant to address the research question?                                                                |           |    |            |                                           |
|                                              | 4.2. Is the sample representative of the target population?                                                                             |           |    |            |                                           |
|                                              | 4.3. Are the measurements appropriate?                                                                                                  |           |    |            |                                           |
|                                              | 4.4. Is the risk of nonresponse bias low?                                                                                               |           |    |            |                                           |
|                                              | 4.5. Is the statistical analysis appropriate to answer the research question?                                                           |           |    |            |                                           |
| 5. Mixed methods                             | 5.1. Is there an adequate rationale for using a mixed methods design to address the research question?                                  | ✓         |    |            |                                           |
|                                              | 5.2. Are the different components of the study effectively integrated to answer the research question?                                  | ✓         |    |            |                                           |
|                                              | 5.3. Are the outputs of the integration of qualitative and quantitative components adequately interpreted?                              | ✓         |    |            |                                           |
|                                              | 5.4. Are divergences and inconsistencies between quantitative and qualitative results adequately addressed?                             | ✓         |    |            |                                           |
|                                              | 5.5. Do the different components of the study adhere to the quality criteria of each tradition of the methods involved?                 | ✓         |    |            |                                           |

Fronek *et al.* 2010

| Category of study designs                    | Methodological quality criteria                                                                                                         | Responses |    |            |                                                  |
|----------------------------------------------|-----------------------------------------------------------------------------------------------------------------------------------------|-----------|----|------------|--------------------------------------------------|
|                                              |                                                                                                                                         | Yes       | No | Can't tell | Comments                                         |
| Screening questions (for all types)          | S1. Are there clear research questions?                                                                                                 | ✓         |    |            |                                                  |
|                                              | S2. Do the collected data allow to address the research questions?                                                                      | ✓         |    |            |                                                  |
|                                              | <i>Further appraisal may not be feasible or appropriate when the answer is 'No' or 'Can't tell' to one or both screening questions.</i> |           |    |            |                                                  |
| 1. Qualitative                               | 1.1. Is the qualitative approach appropriate to answer the research question?                                                           | ✓         |    |            |                                                  |
|                                              | 1.2. Are the qualitative data collection methods adequate to address the research question?                                             | ✓         |    |            |                                                  |
|                                              | 1.3. Are the findings adequately derived from the data?                                                                                 | ✓         |    |            |                                                  |
|                                              | 1.4. Is the interpretation of results sufficiently substantiated by data?                                                               | ✓         |    |            |                                                  |
|                                              | 1.5. Is there coherence between qualitative data sources, collection, analysis and interpretation?                                      | ✓         |    |            |                                                  |
| 2. Quantitative randomized controlled trials | 2.1. Is randomization appropriately performed?                                                                                          |           |    |            |                                                  |
|                                              | 2.2. Are the groups comparable at baseline?                                                                                             |           |    |            |                                                  |
|                                              | 2.3. Are there complete outcome data?                                                                                                   |           |    |            |                                                  |
|                                              | 2.4. Are outcome assessors blinded to the intervention provided?                                                                        |           |    |            |                                                  |
|                                              | 2.5. Did the participants adhere to the assigned intervention?                                                                          |           |    |            |                                                  |
| 3. Quantitative non-randomized               | 3.1. Are the participants representative of the target population?                                                                      | ✓         |    |            |                                                  |
|                                              | 3.2. Are measurements appropriate regarding both the outcome and intervention (or exposure)?                                            | ✓         |    |            |                                                  |
|                                              | 3.3. Are there complete outcome data?                                                                                                   |           | ✓  |            | 25% of data could not be matched so not included |
|                                              | 3.4. Are the confounders accounted for in the design and analysis?                                                                      | ✓         |    |            |                                                  |
|                                              | 3.5. During the study period, is the intervention administered (or exposure occurred) as intended?                                      | ✓         |    |            |                                                  |
| 4. Quantitative descriptive                  | 4.1. Is the sampling strategy relevant to address the research question?                                                                |           |    |            |                                                  |
|                                              | 4.2. Is the sample representative of the target population?                                                                             |           |    |            |                                                  |
|                                              | 4.3. Are the measurements appropriate?                                                                                                  |           |    |            |                                                  |
|                                              | 4.4. Is the risk of nonresponse bias low?                                                                                               |           |    |            |                                                  |
|                                              | 4.5. Is the statistical analysis appropriate to answer the research question?                                                           |           |    |            |                                                  |
| 5. Mixed methods                             | 5.1. Is there an adequate rationale for using a mixed methods design to address the research question?                                  | ✓         |    |            |                                                  |
|                                              | 5.2. Are the different components of the study effectively integrated to answer the research question?                                  | ✓         |    |            |                                                  |
|                                              | 5.3. Are the outputs of the integration of qualitative and quantitative components adequately interpreted?                              | ✓         |    |            |                                                  |
|                                              | 5.4. Are divergences and inconsistencies between quantitative and qualitative results adequately addressed?                             | ✓         |    |            |                                                  |
|                                              | 5.5. Do the different components of the study adhere to the quality criteria of each tradition of the methods involved?                 | ✓         |    |            |                                                  |

Higgins *et al.* 2012

| Category of study designs                    | Methodological quality criteria                                                                                                         | Responses |    |            |          |
|----------------------------------------------|-----------------------------------------------------------------------------------------------------------------------------------------|-----------|----|------------|----------|
|                                              |                                                                                                                                         | Yes       | No | Can't tell | Comments |
| Screening questions (for all types)          | S1. Are there clear research questions?                                                                                                 | ✓         |    |            |          |
|                                              | S2. Do the collected data allow to address the research questions?                                                                      | ✓         |    |            |          |
|                                              | <i>Further appraisal may not be feasible or appropriate when the answer is 'No' or 'Can't tell' to one or both screening questions.</i> |           |    |            |          |
| 1. Qualitative                               | 1.1. Is the qualitative approach appropriate to answer the research question?                                                           | ✓         |    |            |          |
|                                              | 1.2. Are the qualitative data collection methods adequate to address the research question?                                             | ✓         |    |            |          |
|                                              | 1.3. Are the findings adequately derived from the data?                                                                                 | ✓         |    |            |          |
|                                              | 1.4. Is the interpretation of results sufficiently substantiated by data?                                                               | ✓         |    |            |          |
|                                              | 1.5. Is there coherence between qualitative data sources, collection, analysis and interpretation?                                      | ✓         |    |            |          |
| 2. Quantitative randomized controlled trials | 2.1. Is randomization appropriately performed?                                                                                          |           |    |            |          |
|                                              | 2.2. Are the groups comparable at baseline?                                                                                             |           |    |            |          |
|                                              | 2.3. Are there complete outcome data?                                                                                                   |           |    |            |          |
|                                              | 2.4. Are outcome assessors blinded to the intervention provided?                                                                        |           |    |            |          |
|                                              | 2.5. Did the participants adhere to the assigned intervention?                                                                          |           |    |            |          |
| 3. Quantitative non-randomized               | 3.1. Are the participants representative of the target population?                                                                      |           |    |            |          |
|                                              | 3.2. Are measurements appropriate regarding both the outcome and intervention (or exposure)?                                            |           |    |            |          |
|                                              | 3.3. Are there complete outcome data?                                                                                                   |           |    |            |          |
|                                              | 3.4. Are the confounders accounted for in the design and analysis?                                                                      |           |    |            |          |
|                                              | 3.5. During the study period, is the intervention administered (or exposure occurred) as intended?                                      |           |    |            |          |
| 4. Quantitative Descriptive                  | 4.1. Is the sampling strategy relevant to address the research question?                                                                |           |    |            |          |
|                                              | 4.2. Is the sample representative of the target population?                                                                             |           |    |            |          |
|                                              | 4.3. Are the measurements appropriate?                                                                                                  |           |    |            |          |
|                                              | 4.4. Is the risk of nonresponse bias low?                                                                                               |           |    |            |          |
|                                              | 4.5. Is the statistical analysis appropriate to answer the research question?                                                           |           |    |            |          |
| 5. Mixed methods                             | 5.1. Is there an adequate rationale for using a mixed methods design to address the research question?                                  |           |    |            |          |
|                                              | 5.2. Are the different components of the study effectively integrated to answer the research question?                                  |           |    |            |          |
|                                              | 5.3. Are the outputs of the integration of qualitative and quantitative components adequately interpreted?                              |           |    |            |          |
|                                              | 5.4. Are divergences and inconsistencies between quantitative and qualitative results adequately addressed?                             |           |    |            |          |
|                                              | 5.5. Do the different components of the study adhere to the quality criteria of each tradition of the methods involved?                 |           |    |            |          |

Höglund &amp; Larrson, 2019

| Category of study designs                    | Methodological quality criteria                                                                                                         | Responses |    |            |                                     |
|----------------------------------------------|-----------------------------------------------------------------------------------------------------------------------------------------|-----------|----|------------|-------------------------------------|
|                                              |                                                                                                                                         | Yes       | No | Can't tell | Comments                            |
| Screening questions (for all types)          | S1. Are there clear research questions?                                                                                                 | ✓         |    |            |                                     |
|                                              | S2. Do the collected data allow to address the research questions?                                                                      | ✓         |    |            |                                     |
|                                              | <i>Further appraisal may not be feasible or appropriate when the answer is 'No' or 'Can't tell' to one or both screening questions.</i> |           |    |            |                                     |
| 1. Qualitative                               | 1.1. Is the qualitative approach appropriate to answer the research question?                                                           |           |    |            |                                     |
|                                              | 1.2. Are the qualitative data collection methods adequate to address the research question?                                             |           |    |            |                                     |
|                                              | 1.3. Are the findings adequately derived from the data?                                                                                 |           |    |            |                                     |
|                                              | 1.4. Is the interpretation of results sufficiently substantiated by data?                                                               |           |    |            |                                     |
|                                              | 1.5. Is there coherence between qualitative data sources, collection, analysis and interpretation?                                      |           |    |            |                                     |
| 2. Quantitative randomized controlled trials | 2.1. Is randomization appropriately performed?                                                                                          |           |    |            |                                     |
|                                              | 2.2. Are the groups comparable at baseline?                                                                                             |           |    |            |                                     |
|                                              | 2.3. Are there complete outcome data?                                                                                                   |           |    |            |                                     |
|                                              | 2.4. Are outcome assessors blinded to the intervention provided?                                                                        |           |    |            |                                     |
|                                              | 2.5. Did the participants adhere to the assigned intervention?                                                                          |           |    |            |                                     |
| 3. Quantitative non-randomized               | 3.1. Are the participants representative of the target population?                                                                      |           |    |            |                                     |
|                                              | 3.2. Are measurements appropriate regarding both the outcome and intervention (or exposure)?                                            |           |    |            |                                     |
|                                              | 3.3. Are there complete outcome data?                                                                                                   |           |    |            |                                     |
|                                              | 3.4. Are the confounders accounted for in the design and analysis?                                                                      |           |    |            |                                     |
|                                              | 3.5. During the study period, is the intervention administered (or exposure occurred) as intended?                                      |           |    |            |                                     |
| 4. Quantitative descriptive                  | 4.1. Is the sampling strategy relevant to address the research question?                                                                | ✓         |    |            |                                     |
|                                              | 4.2. Is the sample representative of the target population?                                                                             |           | ✓  |            | Demographics relatively homogeneous |
|                                              | 4.3. Are the measurements appropriate?                                                                                                  | ✓         |    |            |                                     |
|                                              | 4.4. Is the risk of nonresponse bias low?                                                                                               |           | ✓  |            |                                     |
|                                              | 4.5. Is the statistical analysis appropriate to answer the research question?                                                           | ✓         |    |            |                                     |
| 5. Mixed methods                             | 5.1. Is there an adequate rationale for using a mixed methods design to address the research question?                                  |           |    |            |                                     |
|                                              | 5.2. Are the different components of the study effectively integrated to answer the research question?                                  |           |    |            |                                     |
|                                              | 5.3. Are the outputs of the integration of qualitative and quantitative components adequately interpreted?                              |           |    |            |                                     |
|                                              | 5.4. Are divergences and inconsistencies between quantitative and qualitative results adequately addressed?                             |           |    |            |                                     |
|                                              | 5.5. Do the different components of the study adhere to the quality criteria of each tradition of the methods involved?                 |           |    |            |                                     |

Kazukauskas &amp; Lam, 2009

| Category of study designs                    | Methodological quality criteria                                                                                                         | Responses |    |            |          |
|----------------------------------------------|-----------------------------------------------------------------------------------------------------------------------------------------|-----------|----|------------|----------|
|                                              |                                                                                                                                         | Yes       | No | Can't tell | Comments |
| Screening questions (for all types)          | S1. Are there clear research questions?                                                                                                 | ✓         |    |            |          |
|                                              | S2. Do the collected data allow to address the research questions?                                                                      | ✓         |    |            |          |
|                                              | <i>Further appraisal may not be feasible or appropriate when the answer is 'No' or 'Can't tell' to one or both screening questions.</i> |           |    |            |          |
| 1. Qualitative                               | 1.1. Is the qualitative approach appropriate to answer the research question?                                                           | ✓         |    |            |          |
|                                              | 1.2. Are the qualitative data collection methods adequate to address the research question?                                             | ✓         |    |            |          |
|                                              | 1.3. Are the findings adequately derived from the data?                                                                                 | ✓         |    |            |          |
|                                              | 1.4. Is the interpretation of results sufficiently substantiated by data?                                                               | ✓         |    |            |          |
|                                              | 1.5. Is there coherence between qualitative data sources, collection, analysis and interpretation?                                      | ✓         |    |            |          |
| 2. Quantitative randomized controlled trials | 2.1. Is randomization appropriately performed?                                                                                          |           |    |            |          |
|                                              | 2.2. Are the groups comparable at baseline?                                                                                             |           |    |            |          |
|                                              | 2.3. Are there complete outcome data?                                                                                                   |           |    |            |          |
|                                              | 2.4. Are outcome assessors blinded to the intervention provided?                                                                        |           |    |            |          |
|                                              | 2.5. Did the participants adhere to the assigned intervention?                                                                          |           |    |            |          |
| 3. Quantitative non-randomized               | 3.1. Are the participants representative of the target population?                                                                      |           |    |            |          |
|                                              | 3.2. Are measurements appropriate regarding both the outcome and intervention (or exposure)?                                            |           |    |            |          |
|                                              | 3.3. Are there complete outcome data?                                                                                                   |           |    |            |          |
|                                              | 3.4. Are the confounders accounted for in the design and analysis?                                                                      |           |    |            |          |
|                                              | 3.5. During the study period, is the intervention administered (or exposure occurred) as intended?                                      |           |    |            |          |
| 4. Quantitative descriptive                  | 4.1. Is the sampling strategy relevant to address the research question?                                                                |           |    |            |          |
|                                              | 4.2. Is the sample representative of the target population?                                                                             |           |    |            |          |
|                                              | 4.3. Are the measurements appropriate?                                                                                                  |           |    |            |          |
|                                              | 4.4. Is the risk of nonresponse bias low?                                                                                               |           |    |            |          |
|                                              | 4.5. Is the statistical analysis appropriate to answer the research question?                                                           |           |    |            |          |
| 5. Mixed methods                             | 5.1. Is there an adequate rationale for using a mixed methods design to address the research question?                                  |           |    |            |          |
|                                              | 5.2. Are the different components of the study effectively integrated to answer the research question?                                  |           |    |            |          |
|                                              | 5.3. Are the outputs of the integration of qualitative and quantitative components adequately interpreted?                              |           |    |            |          |
|                                              | 5.4. Are divergences and inconsistencies between quantitative and qualitative results adequately addressed?                             |           |    |            |          |
|                                              | 5.5. Do the different components of the study adhere to the quality criteria of each tradition of the methods involved?                 |           |    |            |          |

Lee *et al.* 2015

| Category of study designs                    | Methodological quality criteria                                                                                                  | Responses |    |            |                                       |
|----------------------------------------------|----------------------------------------------------------------------------------------------------------------------------------|-----------|----|------------|---------------------------------------|
|                                              |                                                                                                                                  | Yes       | No | Can't tell | Comments                              |
| Screening questions (for all types)          | S1. Are there clear research questions?                                                                                          | ✓         |    |            |                                       |
|                                              | S2. Do the collected data allow to address the research questions?                                                               | ✓         |    |            |                                       |
|                                              | Further appraisal may not be feasible or appropriate when the answer is 'No' or 'Can't tell' to one or both screening questions. |           |    |            |                                       |
| 1. Qualitative                               | 1.1. Is the qualitative approach appropriate to answer the research question?                                                    |           |    |            |                                       |
|                                              | 1.2. Are the qualitative data collection methods adequate to address the research question?                                      |           |    |            |                                       |
|                                              | 1.3. Are the findings adequately derived from the data?                                                                          |           |    |            |                                       |
|                                              | 1.4. Is the interpretation of results sufficiently substantiated by data?                                                        |           |    |            |                                       |
|                                              | 1.5. Is there coherence between qualitative data sources, collection, analysis and interpretation?                               |           |    |            |                                       |
| 2. Quantitative randomized controlled trials | 2.1. Is randomization appropriately performed?                                                                                   |           |    |            |                                       |
|                                              | 2.2. Are the groups comparable at baseline?                                                                                      |           |    |            |                                       |
|                                              | 2.3. Are there complete outcome data?                                                                                            |           |    |            |                                       |
|                                              | 2.4. Are outcome assessors blinded to the intervention provided?                                                                 |           |    |            |                                       |
|                                              | 2.5. Did the participants adhere to the assigned intervention?                                                                   |           |    |            |                                       |
| 3. Quantitative non-randomized               | 3.1. Are the participants representative of the target population?                                                               |           |    |            |                                       |
|                                              | 3.2. Are measurements appropriate regarding both the outcome and intervention (or exposure)?                                     |           |    |            |                                       |
|                                              | 3.3. Are there complete outcome data?                                                                                            |           |    |            |                                       |
|                                              | 3.4. Are the confounders accounted for in the design and analysis?                                                               |           |    |            |                                       |
|                                              | 3.5. During the study period, is the intervention administered (or exposure occurred) as intended?                               |           |    |            |                                       |
| 4. Quantitative descriptive                  | 4.1. Is the sampling strategy relevant to address the research question?                                                         | ✓         |    |            |                                       |
|                                              | 4.2. Is the sample representative of the target population?                                                                      |           | ✓  |            | Roughly 47% of sent surveys completed |
|                                              | 4.3. Are the measurements appropriate?                                                                                           | ✓         |    |            |                                       |
|                                              | 4.4. Is the risk of nonresponse bias low?                                                                                        |           | ✓  |            |                                       |
|                                              | 4.5. Is the statistical analysis appropriate to answer the research question?                                                    | ✓         |    |            |                                       |
| 5. Mixed methods                             | 5.1. Is there an adequate rationale for using a mixed methods design to address the research question?                           |           |    |            |                                       |
|                                              | 5.2. Are the different components of the study effectively integrated to answer the research question?                           |           |    |            |                                       |
|                                              | 5.3. Are the outputs of the integration of qualitative and quantitative components adequately interpreted?                       |           |    |            |                                       |
|                                              | 5.4. Are divergences and inconsistencies between quantitative and qualitative results adequately addressed?                      |           |    |            |                                       |
|                                              | 5.5. Do the different components of the study adhere to the quality criteria of each tradition of the methods involved?          |           |    |            |                                       |

Molloy &amp; Herold, 1985

| Category of study designs                    | Methodological quality criteria                                                                                                         | Responses |    |            |                                       |
|----------------------------------------------|-----------------------------------------------------------------------------------------------------------------------------------------|-----------|----|------------|---------------------------------------|
|                                              |                                                                                                                                         | Yes       | No | Can't tell | Comments                              |
| Screening questions (for all types)          | S1. Are there clear research questions?                                                                                                 | ✓         |    |            |                                       |
|                                              | S2. Do the collected data allow to address the research questions?                                                                      | ✓         |    |            |                                       |
|                                              | <i>Further appraisal may not be feasible or appropriate when the answer is 'No' or 'Can't tell' to one or both screening questions.</i> |           |    |            |                                       |
| 1. Qualitative                               | 1.1. Is the qualitative approach appropriate to answer the research question?                                                           |           |    |            |                                       |
|                                              | 1.2. Are the qualitative data collection methods adequate to address the research question?                                             |           |    |            |                                       |
|                                              | 1.3. Are the findings adequately derived from the data?                                                                                 |           |    |            |                                       |
|                                              | 1.4. Is the interpretation of results sufficiently substantiated by data?                                                               |           |    |            |                                       |
|                                              | 1.5. Is there coherence between qualitative data sources, collection, analysis and interpretation?                                      |           |    |            |                                       |
| 2. Quantitative randomized controlled trials | 2.1. Is randomization appropriately performed?                                                                                          |           |    |            |                                       |
|                                              | 2.2. Are the groups comparable at baseline?                                                                                             |           |    |            |                                       |
|                                              | 2.3. Are there complete outcome data?                                                                                                   |           |    |            |                                       |
|                                              | 2.4. Are outcome assessors blinded to the intervention provided?                                                                        |           |    |            |                                       |
|                                              | 2.5. Did the participants adhere to the assigned intervention?                                                                          |           |    |            |                                       |
| 3. Quantitative non-randomized               | 3.1. Are the participants representative of the target population?                                                                      |           |    |            |                                       |
|                                              | 3.2. Are measurements appropriate regarding both the outcome and intervention (or exposure)?                                            |           |    |            |                                       |
|                                              | 3.3. Are there complete outcome data?                                                                                                   |           |    |            |                                       |
|                                              | 3.4. Are the confounders accounted for in the design and analysis?                                                                      |           |    |            |                                       |
|                                              | 3.5. During the study period, is the intervention administered (or exposure occurred) as intended?                                      |           |    |            |                                       |
| 4. Quantitative descriptive                  | 4.1. Is the sampling strategy relevant to address the research question?                                                                | ✓         |    |            |                                       |
|                                              | 4.2. Is the sample representative of the target population?                                                                             |           | ✓  |            | Roughly 16% of sent surveys completed |
|                                              | 4.3. Are the measurements appropriate?                                                                                                  | ✓         |    |            |                                       |
|                                              | 4.4. Is the risk of nonresponse bias low?                                                                                               |           | ✓  |            |                                       |
|                                              | 4.5. Is the statistical analysis appropriate to answer the research question?                                                           | ✓         |    |            |                                       |
| 5. Mixed methods                             | 5.1. Is there an adequate rationale for using a mixed methods design to address the research question?                                  |           |    |            |                                       |
|                                              | 5.2. Are the different components of the study effectively integrated to answer the research question?                                  |           |    |            |                                       |
|                                              | 5.3. Are the outputs of the integration of qualitative and quantitative components adequately interpreted?                              |           |    |            |                                       |
|                                              | 5.4. Are divergences and inconsistencies between quantitative and qualitative results adequately addressed?                             |           |    |            |                                       |
|                                              | 5.5. Do the different components of the study adhere to the quality criteria of each tradition of the methods involved?                 |           |    |            |                                       |

Murphy *et al.* 2015

| Category of study designs                    | Methodological quality criteria                                                                                                         | Responses |    |            |          |
|----------------------------------------------|-----------------------------------------------------------------------------------------------------------------------------------------|-----------|----|------------|----------|
|                                              |                                                                                                                                         | Yes       | No | Can't tell | Comments |
| Screening questions (for all types)          | S1. Are there clear research questions?                                                                                                 | ✓         |    |            |          |
|                                              | S2. Do the collected data allow to address the research questions?                                                                      | ✓         |    |            |          |
|                                              | <i>Further appraisal may not be feasible or appropriate when the answer is 'No' or 'Can't tell' to one or both screening questions.</i> |           |    |            |          |
| 1. Qualitative                               | 1.1. Is the qualitative approach appropriate to answer the research question?                                                           | ✓         |    |            |          |
|                                              | 1.2. Are the qualitative data collection methods adequate to address the research question?                                             | ✓         |    |            |          |
|                                              | 1.3. Are the findings adequately derived from the data?                                                                                 | ✓         |    |            |          |
|                                              | 1.4. Is the interpretation of results sufficiently substantiated by data?                                                               | ✓         |    |            |          |
|                                              | 1.5. Is there coherence between qualitative data sources, collection, analysis and interpretation?                                      | ✓         |    |            |          |
| 2. Quantitative randomized controlled trials | 2.1. Is randomization appropriately performed?                                                                                          |           |    |            |          |
|                                              | 2.2. Are the groups comparable at baseline?                                                                                             |           |    |            |          |
|                                              | 2.3. Are there complete outcome data?                                                                                                   |           |    |            |          |
|                                              | 2.4. Are outcome assessors blinded to the intervention provided?                                                                        |           |    |            |          |
|                                              | 2.5. Did the participants adhere to the assigned intervention?                                                                          |           |    |            |          |
| 3. Quantitative non-randomized               | 3.1. Are the participants representative of the target population?                                                                      |           |    |            |          |
|                                              | 3.2. Are measurements appropriate regarding both the outcome and intervention (or exposure)?                                            |           |    |            |          |
|                                              | 3.3. Are there complete outcome data?                                                                                                   |           |    |            |          |
|                                              | 3.4. Are the confounders accounted for in the design and analysis?                                                                      |           |    |            |          |
|                                              | 3.5. During the study period, is the intervention administered (or exposure occurred) as intended?                                      |           |    |            |          |
| 4. Quantitative descriptive                  | 4.1. Is the sampling strategy relevant to address the research question?                                                                |           |    |            |          |
|                                              | 4.2. Is the sample representative of the target population?                                                                             |           |    |            |          |
|                                              | 4.3. Are the measurements appropriate?                                                                                                  |           |    |            |          |
|                                              | 4.4. Is the risk of nonresponse bias low?                                                                                               |           |    |            |          |
|                                              | 4.5. Is the statistical analysis appropriate to answer the research question?                                                           |           |    |            |          |
| 5. Mixed methods                             | 5.1. Is there an adequate rationale for using a mixed methods design to address the research question?                                  |           |    |            |          |
|                                              | 5.2. Are the different components of the study effectively integrated to answer the research question?                                  |           |    |            |          |
|                                              | 5.3. Are the outputs of the integration of qualitative and quantitative components adequately interpreted?                              |           |    |            |          |
|                                              | 5.4. Are divergences and inconsistencies between quantitative and qualitative results adequately addressed?                             |           |    |            |          |
|                                              | 5.5. Do the different components of the study adhere to the quality criteria of each tradition of the methods involved?                 |           |    |            |          |

Ride &amp; Newton, 2018

| Category of study designs                    | Methodological quality criteria                                                                                                         | Responses |    |            |                                      |
|----------------------------------------------|-----------------------------------------------------------------------------------------------------------------------------------------|-----------|----|------------|--------------------------------------|
|                                              |                                                                                                                                         | Yes       | No | Can't tell | Comments                             |
| Screening questions (for all types)          | S1. Are there clear research questions?                                                                                                 | ✓         |    |            |                                      |
|                                              | S2. Do the collected data allow to address the research questions?                                                                      | ✓         |    |            |                                      |
|                                              | <i>Further appraisal may not be feasible or appropriate when the answer is 'No' or 'Can't tell' to one or both screening questions.</i> |           |    |            |                                      |
| 1. Qualitative                               | 1.1. Is the qualitative approach appropriate to answer the research question?                                                           |           |    |            |                                      |
|                                              | 1.2. Are the qualitative data collection methods adequate to address the research question?                                             |           |    |            |                                      |
|                                              | 1.3. Are the findings adequately derived from the data?                                                                                 |           |    |            |                                      |
|                                              | 1.4. Is the interpretation of results sufficiently substantiated by data?                                                               |           |    |            |                                      |
|                                              | 1.5. Is there coherence between qualitative data sources, collection, analysis and interpretation?                                      |           |    |            |                                      |
| 2. Quantitative randomized controlled trials | 2.1. Is randomization appropriately performed?                                                                                          |           |    |            |                                      |
|                                              | 2.2. Are the groups comparable at baseline?                                                                                             |           |    |            |                                      |
|                                              | 2.3. Are there complete outcome data?                                                                                                   |           |    |            |                                      |
|                                              | 2.4. Are outcome assessors blinded to the intervention provided?                                                                        |           |    |            |                                      |
|                                              | 2.5. Did the participants adhere to the assigned intervention?                                                                          |           |    |            |                                      |
| 3. Quantitative non-randomized               | 3.1. Are the participants representative of the target population?                                                                      | ✓         |    |            |                                      |
|                                              | 3.2. Are measurements appropriate regarding both the outcome and intervention (or exposure)?                                            | ✓         |    |            |                                      |
|                                              | 3.3. Are there complete outcome data?                                                                                                   |           | ✓  |            | 54% drop-off rate between follow-ups |
|                                              | 3.4. Are the confounders accounted for in the design and analysis?                                                                      | ✓         |    |            |                                      |
|                                              | 3.5. During the study period, is the intervention administered (or exposure occurred) as intended?                                      |           | ✓  |            | Potential intergroup discussion      |
| 4. Quantitative descriptive                  | 4.1. Is the sampling strategy relevant to address the research question?                                                                |           |    |            |                                      |
|                                              | 4.2. Is the sample representative of the target population?                                                                             |           |    |            |                                      |
|                                              | 4.3. Are the measurements appropriate?                                                                                                  |           |    |            |                                      |
|                                              | 4.4. Is the risk of nonresponse bias low?                                                                                               |           |    |            |                                      |
|                                              | 4.5. Is the statistical analysis appropriate to answer the research question?                                                           |           |    |            |                                      |
| 5. Mixed methods                             | 5.1. Is there an adequate rationale for using a mixed methods design to address the research question?                                  |           |    |            |                                      |
|                                              | 5.2. Are the different components of the study effectively integrated to answer the research question?                                  |           |    |            |                                      |
|                                              | 5.3. Are the outputs of the integration of qualitative and quantitative components adequately interpreted?                              |           |    |            |                                      |
|                                              | 5.4. Are divergences and inconsistencies between quantitative and qualitative results adequately addressed?                             |           |    |            |                                      |
|                                              | 5.5. Do the different components of the study adhere to the quality criteria of each tradition of the methods involved?                 |           |    |            |                                      |

Simpson *et al.* 2006

| Category of study designs                    | Methodological quality criteria                                                                                                         | Responses |    |            |          |
|----------------------------------------------|-----------------------------------------------------------------------------------------------------------------------------------------|-----------|----|------------|----------|
|                                              |                                                                                                                                         | Yes       | No | Can't tell | Comments |
| Screening questions (for all types)          | S1. Are there clear research questions?                                                                                                 | ✓         |    |            |          |
|                                              | S2. Do the collected data allow to address the research questions?                                                                      | ✓         |    |            |          |
|                                              | <i>Further appraisal may not be feasible or appropriate when the answer is 'No' or 'Can't tell' to one or both screening questions.</i> |           |    |            |          |
| 1. Qualitative                               | 1.1. Is the qualitative approach appropriate to answer the research question?                                                           | ✓         |    |            |          |
|                                              | 1.2. Are the qualitative data collection methods adequate to address the research question?                                             | ✓         |    |            |          |
|                                              | 1.3. Are the findings adequately derived from the data?                                                                                 | ✓         |    |            |          |
|                                              | 1.4. Is the interpretation of results sufficiently substantiated by data?                                                               | ✓         |    |            |          |
|                                              | 1.5. Is there coherence between qualitative data sources, collection, analysis and interpretation?                                      | ✓         |    |            |          |
| 2. Quantitative randomized controlled trials | 2.1. Is randomization appropriately performed?                                                                                          |           |    |            |          |
|                                              | 2.2. Are the groups comparable at baseline?                                                                                             |           |    |            |          |
|                                              | 2.3. Are there complete outcome data?                                                                                                   |           |    |            |          |
|                                              | 2.4. Are outcome assessors blinded to the intervention provided?                                                                        |           |    |            |          |
|                                              | 2.5. Did the participants adhere to the assigned intervention?                                                                          |           |    |            |          |
| 3. Quantitative non-randomized               | 3.1. Are the participants representative of the target population?                                                                      |           |    |            |          |
|                                              | 3.2. Are measurements appropriate regarding both the outcome and intervention (or exposure)?                                            |           |    |            |          |
|                                              | 3.3. Are there complete outcome data?                                                                                                   |           |    |            |          |
|                                              | 3.4. Are the confounders accounted for in the design and analysis?                                                                      |           |    |            |          |
|                                              | 3.5. During the study period, is the intervention administered (or exposure occurred) as intended?                                      |           |    |            |          |
| 4. Quantitative descriptive                  | 4.1. Is the sampling strategy relevant to address the research question?                                                                |           |    |            |          |
|                                              | 4.2. Is the sample representative of the target population?                                                                             |           |    |            |          |
|                                              | 4.3. Are the measurements appropriate?                                                                                                  |           |    |            |          |
|                                              | 4.4. Is the risk of nonresponse bias low?                                                                                               |           |    |            |          |
|                                              | 4.5. Is the statistical analysis appropriate to answer the research question?                                                           |           |    |            |          |
| 5. Mixed methods                             | 5.1. Is there an adequate rationale for using a mixed methods design to address the research question?                                  |           |    |            |          |
|                                              | 5.2. Are the different components of the study effectively integrated to answer the research question?                                  |           |    |            |          |
|                                              | 5.3. Are the outputs of the integration of qualitative and quantitative components adequately interpreted?                              |           |    |            |          |
|                                              | 5.4. Are divergences and inconsistencies between quantitative and qualitative results adequately addressed?                             |           |    |            |          |
|                                              | 5.5. Do the different components of the study adhere to the quality criteria of each tradition of the methods involved?                 |           |    |            |          |

Smith *et al.* 2004

| Category of study designs                    | Methodological quality criteria                                                                                                         | Responses |    |            |          |
|----------------------------------------------|-----------------------------------------------------------------------------------------------------------------------------------------|-----------|----|------------|----------|
|                                              |                                                                                                                                         | Yes       | No | Can't tell | Comments |
| Screening questions (for all types)          | S1. Are there clear research questions?                                                                                                 | ✓         |    |            |          |
|                                              | S2. Do the collected data allow to address the research questions?                                                                      | ✓         |    |            |          |
|                                              | <i>Further appraisal may not be feasible or appropriate when the answer is 'No' or 'Can't tell' to one or both screening questions.</i> |           |    |            |          |
| 1. Qualitative                               | 1.1. Is the qualitative approach appropriate to answer the research question?                                                           | ✓         |    |            |          |
|                                              | 1.2. Are the qualitative data collection methods adequate to address the research question?                                             | ✓         |    |            |          |
|                                              | 1.3. Are the findings adequately derived from the data?                                                                                 | ✓         |    |            |          |
|                                              | 1.4. Is the interpretation of results sufficiently substantiated by data?                                                               | ✓         |    |            |          |
|                                              | 1.5. Is there coherence between qualitative data sources, collection, analysis and interpretation?                                      | ✓         |    |            |          |
| 2. Quantitative randomized controlled trials | 2.1. Is randomization appropriately performed?                                                                                          |           |    |            |          |
|                                              | 2.2. Are the groups comparable at baseline?                                                                                             |           |    |            |          |
|                                              | 2.3. Are there complete outcome data?                                                                                                   |           |    |            |          |
|                                              | 2.4. Are outcome assessors blinded to the intervention provided?                                                                        |           |    |            |          |
|                                              | 2.5. Did the participants adhere to the assigned intervention?                                                                          |           |    |            |          |
| 3. Quantitative non-randomized               | 3.1. Are the participants representative of the target population?                                                                      |           |    |            |          |
|                                              | 3.2. Are measurements appropriate regarding both the outcome and intervention (or exposure)?                                            |           |    |            |          |
|                                              | 3.3. Are there complete outcome data?                                                                                                   |           |    |            |          |
|                                              | 3.4. Are the confounders accounted for in the design and analysis?                                                                      |           |    |            |          |
|                                              | 3.5. During the study period, is the intervention administered (or exposure occurred) as intended?                                      |           |    |            |          |
| 4. Quantitative descriptive                  | 4.1. Is the sampling strategy relevant to address the research question?                                                                |           |    |            |          |
|                                              | 4.2. Is the sample representative of the target population?                                                                             |           |    |            |          |
|                                              | 4.3. Are the measurements appropriate?                                                                                                  |           |    |            |          |
|                                              | 4.4. Is the risk of nonresponse bias low?                                                                                               |           |    |            |          |
|                                              | 4.5. Is the statistical analysis appropriate to answer the research question?                                                           |           |    |            |          |
| 5. Mixed methods                             | 5.1. Is there an adequate rationale for using a mixed methods design to address the research question?                                  |           |    |            |          |
|                                              | 5.2. Are the different components of the study effectively integrated to answer the research question?                                  |           |    |            |          |
|                                              | 5.3. Are the outputs of the integration of qualitative and quantitative components adequately interpreted?                              |           |    |            |          |
|                                              | 5.4. Are divergences and inconsistencies between quantitative and qualitative results adequately addressed?                             |           |    |            |          |
|                                              | 5.5. Do the different components of the study adhere to the quality criteria of each tradition of the methods involved?                 |           |    |            |          |

Thompson *et al.* 2014
